# Supplementary material
Source: PubMed Central journal article supplement (PMC3030152)
Supplement: mmc1.pdf [file mmc1.pdf]

**TABLE S1.** Individual ion currents [in pA] at various TM potentials.

|      | S1             |                 | S2             |                 | S3             |                 |
|------|----------------|-----------------|----------------|-----------------|----------------|-----------------|
|      | I <sub>K</sub> | I <sub>Cl</sub> | I <sub>K</sub> | I <sub>Cl</sub> | I <sub>K</sub> | I <sub>Cl</sub> |
| n100 | -118           | -318            | -112           | -387            | -166           | -393            |
| n75  | -128           | -254            | -120           | -291            | -166           | -323            |
| n50  | -51            | -179            | -29            | -166            | -88            | -264            |
| n25  | 5              | -96             | 3              | -112            | -45            | -104            |
| p25  | 45             | 94              | 59             | 94              | 53             | 59              |
| p50  | 67             | 126             | 115            | 142             | 83             | 136             |
| p75  | 174            | 203             | 118            | 227             | 88             | 120             |
| p100 | 147            | 382             | 171            | 251             | 182            | 342             |

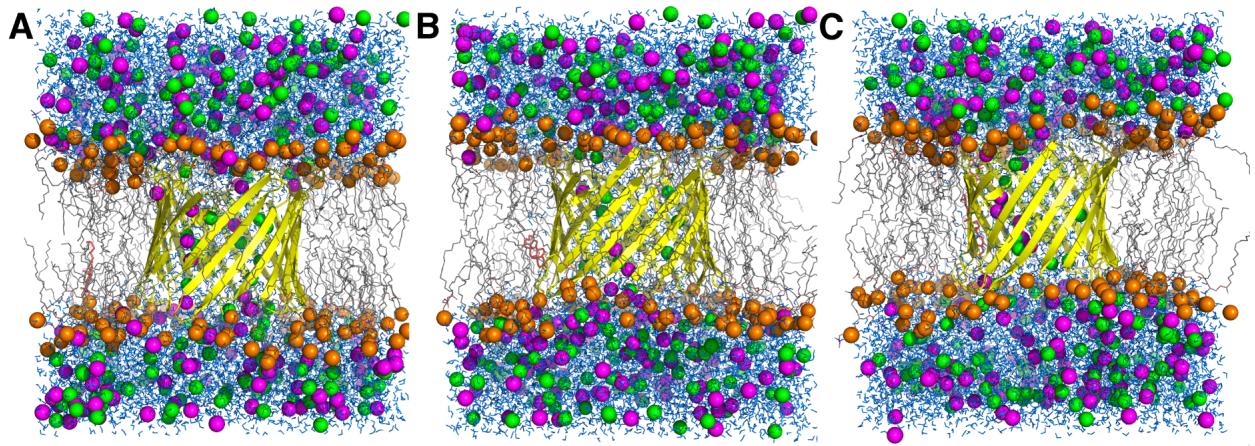

**FIGURE S1.** Molecular representation of systems (A) S1\_n100, (B) S2\_0, and (C) S3\_p100 at the end of the simulations: hVDAC1, *yellow ribbon*; phosphates of DOPE and DOPC molecules, *orange spheres*; remainder of the lipids, *grey lines*; cholesterol, *red lines*; water, *marine*; K<sup>+</sup>, *magenta*; and Cl<sup>-</sup>, *green*. The figures were produced with PyMOL.

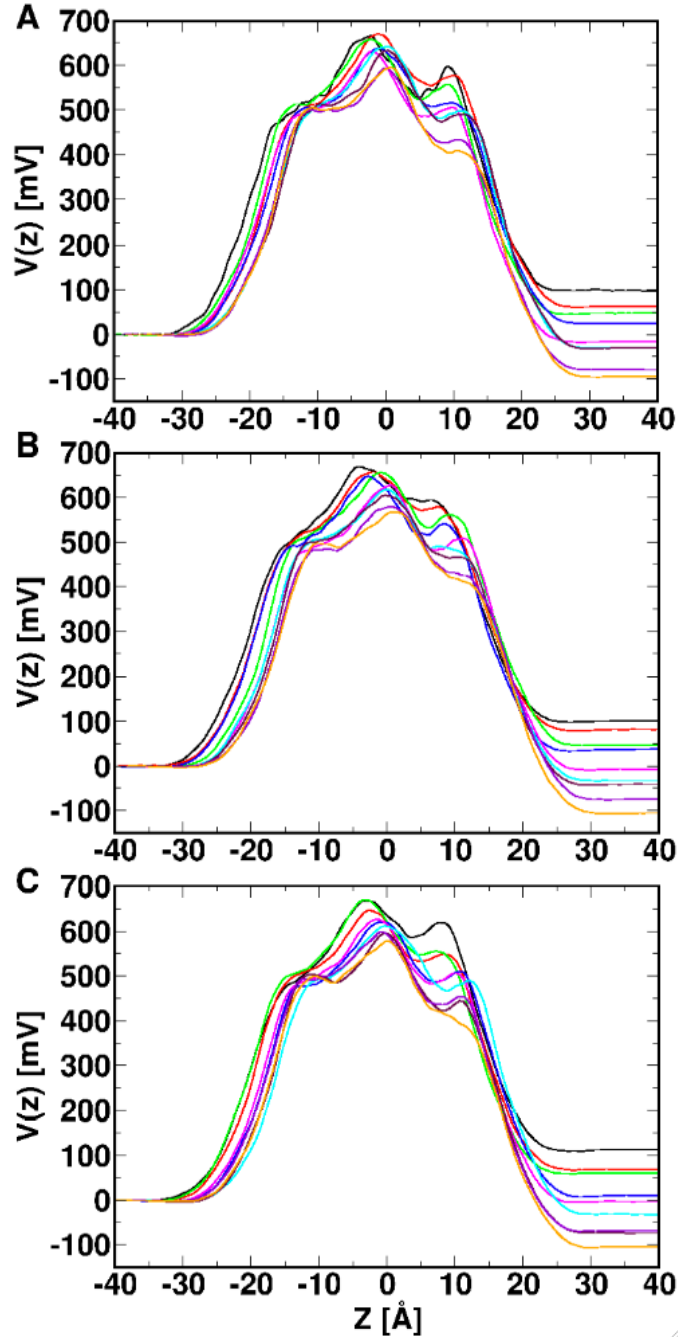

**FIGURE S2.** Electrostatic potential  $V(z)$  profiles along the  $Z$ -axis in the simulation set S1 (A), S2 (B) and S3 (C). Systems with different TM potentials are presented using different color schemes:  $V_{mp} = -100$  mV (*black*),  $-75$  mV (*red*),  $-50$  mV (*green*),  $-25$  mV (*blue*),  $0$  mV (*magenta*),  $25$  mV (*cyan*),  $50$  mV (*maroon*),  $75$  mV (*violet*), and  $100$  mV (*orange*). Because the resulting  $V(z)$  is sensitive on the choice of the integration region along the  $Z$ -axis, the calculated profiles cover different  $Z$ -ranges starting from  $Z = -40.0$  Å to values near  $40.0$  Å. To clearly indicate the potential difference across the simulation cell, all the  $Z$ -ranges are extended to  $40.0$  Å with the  $V(z)$  value at their ending value between  $Z = 30.0$  Å and  $Z = 35.0$  Å.

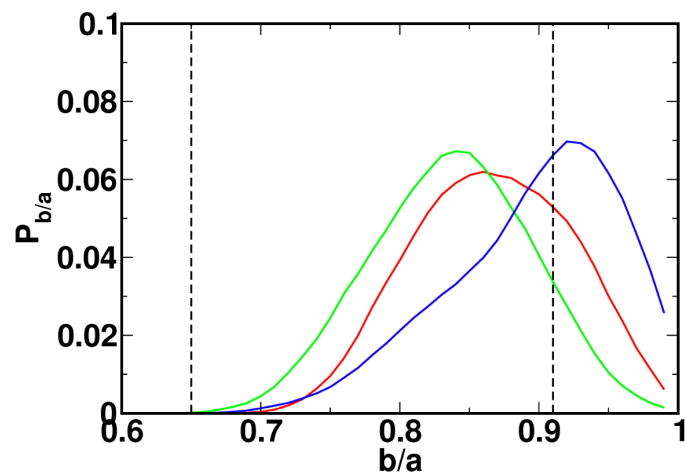

**FIGURE S3.** The normalized population histogram of the ratio between the short axis and the long axis of the ellipse formed by the  $\beta$ -barrel. The ratios are collected for systems under all TM potentials in each simulations set: S1 (*red*), S2 (*green*), and S3 (*blue*). The dashed lines show the span of the ratios calculated from the NMR structure ensemble.

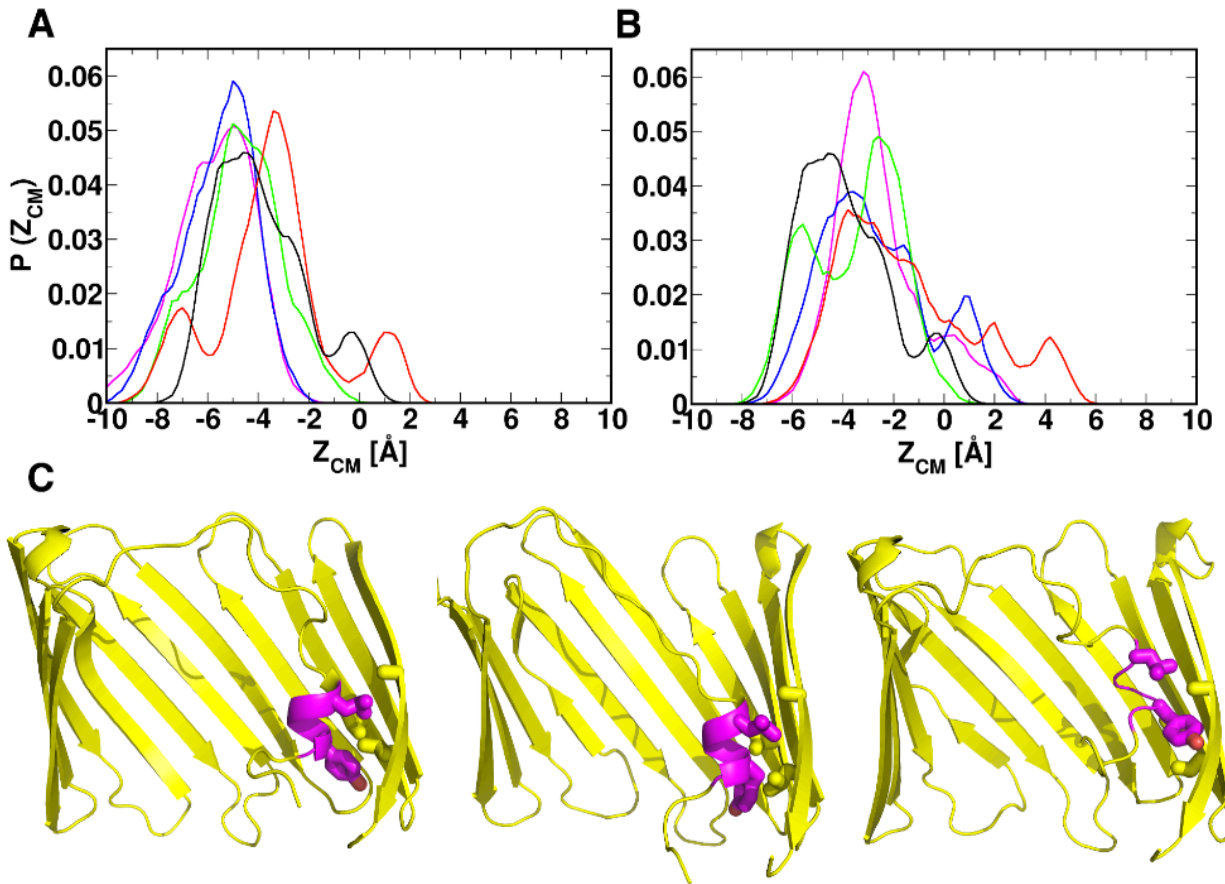

**FIGURE S4.** (A and B) Population of the Z-position ( $Z_{CM}$ ) of the N-terminal  $\alpha$ -helix.  $Z_{CM}$  are collected for systems with (A)  $V_{mp} = 0$  mV (black), -25 mV (red), -50 mV (green), -75 mV (blue), and -100 mV (magenta), and (B)  $V_{mp} = 0$  mV (black), 25 mV (red), 50 mV (green), 75 mV (blue), and 100 mV (magenta). (C) Interaction between the N-terminal  $\alpha$ -helix residues (magenta sticks with Tyr7 (bottom) and Leu10 (top)) and the pore lining residues (yellow sticks with Val143 (middle), Leu150 (bottom), and Ala170 (top)): (left)  $Z_{CM} = -8.0$  Å, (middle)  $Z_{CM} = -4.0$  Å, and (right)  $Z_{CM} = 4.0$  Å.

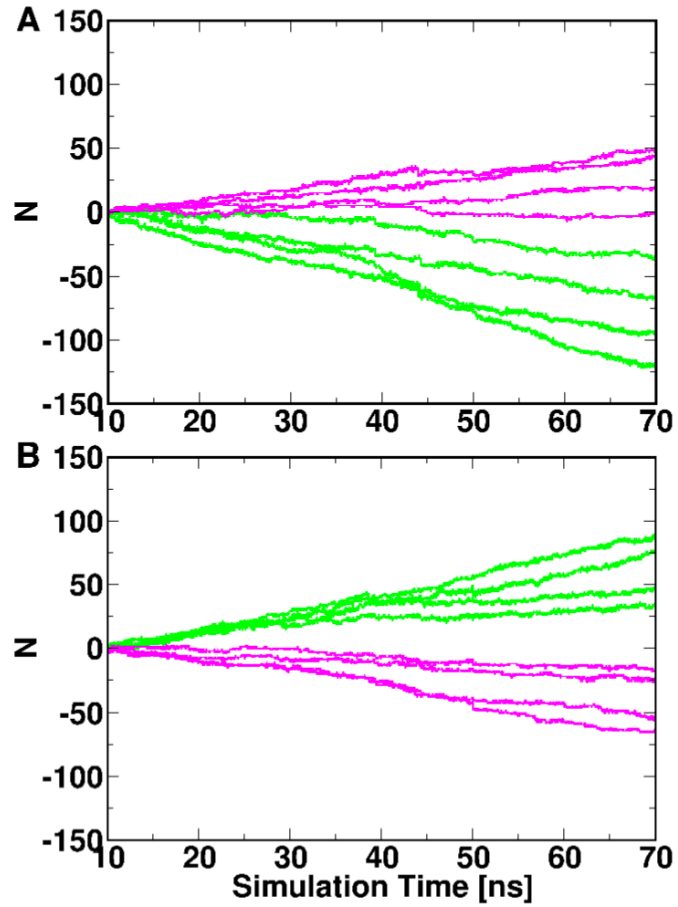

**FIGURE S5.** Accumulated ion crossing number for  $K^+$  (*magenta*) and  $Cl^-$  (*green*) in the last 60 ns of the set S1 under (A) positive and (B) negative TM potentials. From top to bottom in (A) are  $V_{mp} = 100, 75, 50, 25$  mV for  $N_K$  and  $V_{mp} = 25, 50, 75,$  and  $100$  mV for  $N_{Cl}$ . From top to bottom in (B) are  $V_{mp} = -100, -75, -50, -25$  mV for  $N_{Cl}$  and  $V_{mp} = -25, -50, -75,$  and  $-100$  mV for  $N_K$ .

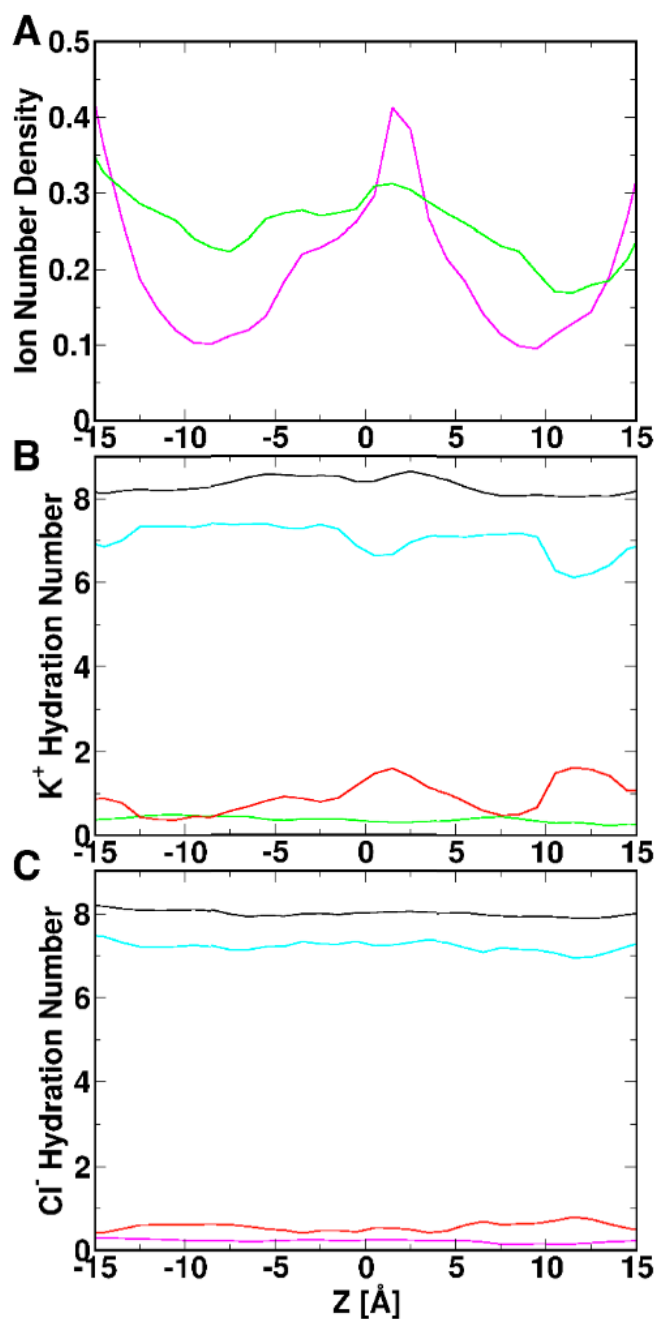

**FIGURE S6.** (A) Ion density profiles along the Z-axis in the pore region ( $-15.0 \text{ \AA} \leq Z \leq 15.0 \text{ \AA}$ ):  $K^+$  (*magenta*) and  $Cl^-$  (*green*). The densities are averaged for three independent simulations with  $V_{mp} = 0$ . (B)  $K^+$  ion hydration number profiles and (C)  $Cl^-$  ion hydration number profiles along the Z-axis in systems with  $V_{mp} = 0$ . The hydration partners for  $K^+$  include water oxygen (*cyan*), protein oxygen (*red*) and  $Cl^-$  ions (*green*), while those for  $Cl^-$  include water oxygen (*cyan*), protein nitrogen (*red*) and  $K^+$  ions (*magenta*). The total hydration number (*black*) is also shown. A cutoff of  $4.0 \text{ \AA}$  is used to count the hydration partners.

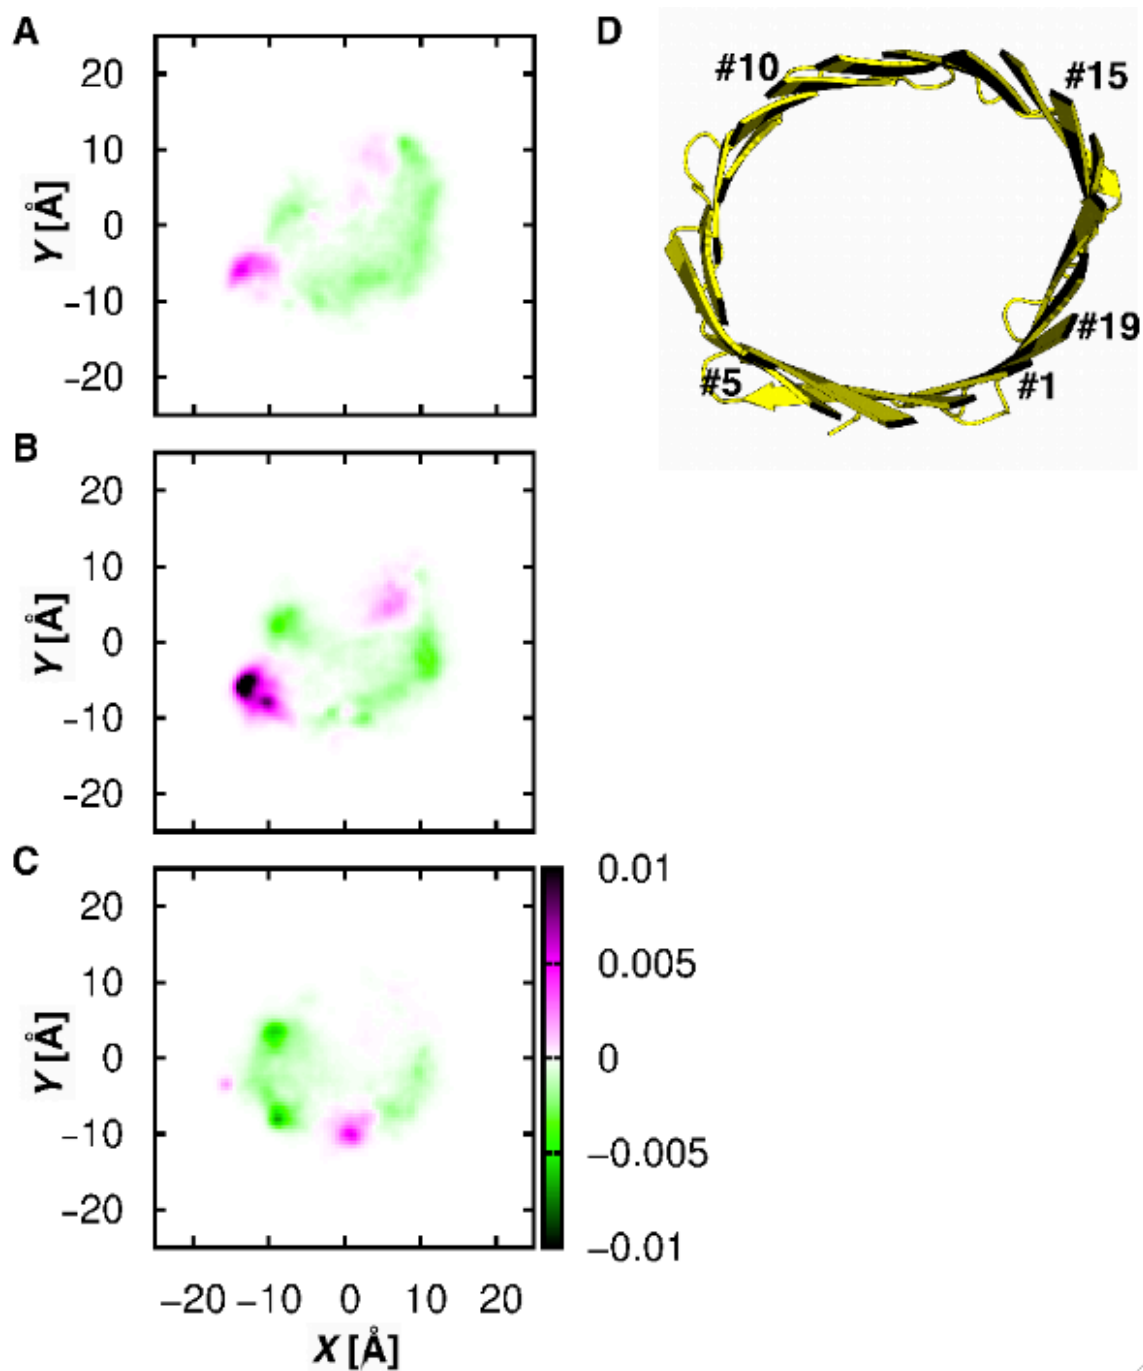

**FIGURE S7.** Cross-sectional ion distributions on the X-Y plane in three regions along the Z-axis: (A)  $4.0 \text{ \AA} \leq Z \leq 8.0 \text{ \AA}$ , (B)  $-2.0 \text{ \AA} \leq Z \leq 2.0 \text{ \AA}$ , and (C)  $-8.0 \text{ \AA} \leq Z \leq -4.0 \text{ \AA}$ . The charge distributions are calculated from S2\_0. (D) A molecular representation of hVDAC1 channel with its  $\beta$ -strands numbered. The first  $\beta$ -strand from the N-terminus of the channel is numbered as #1.



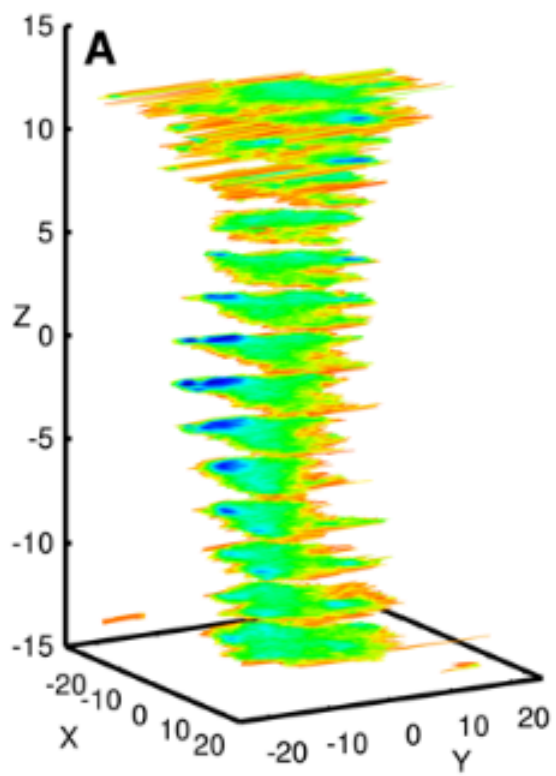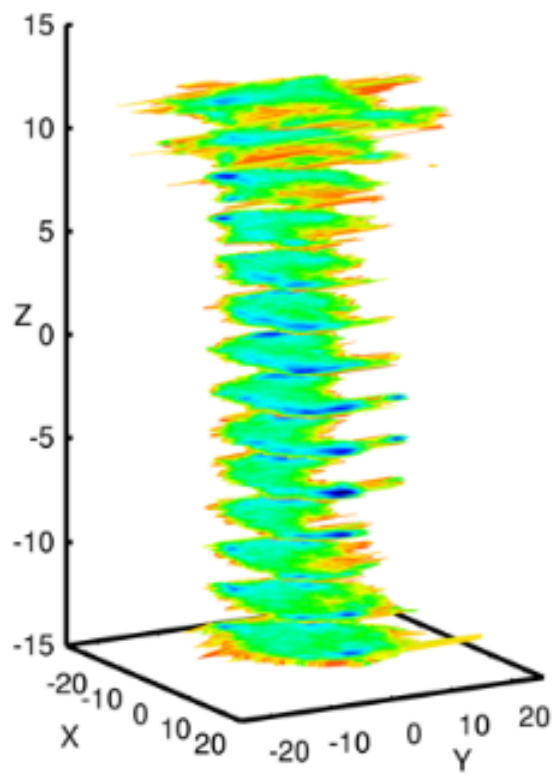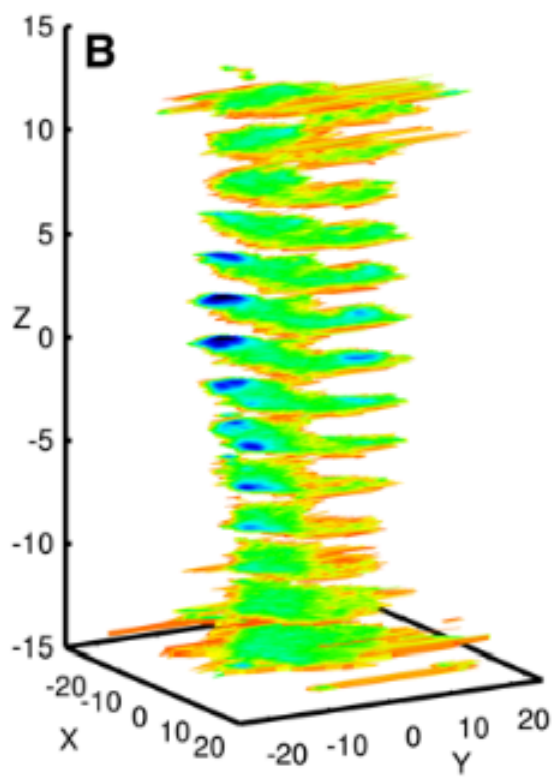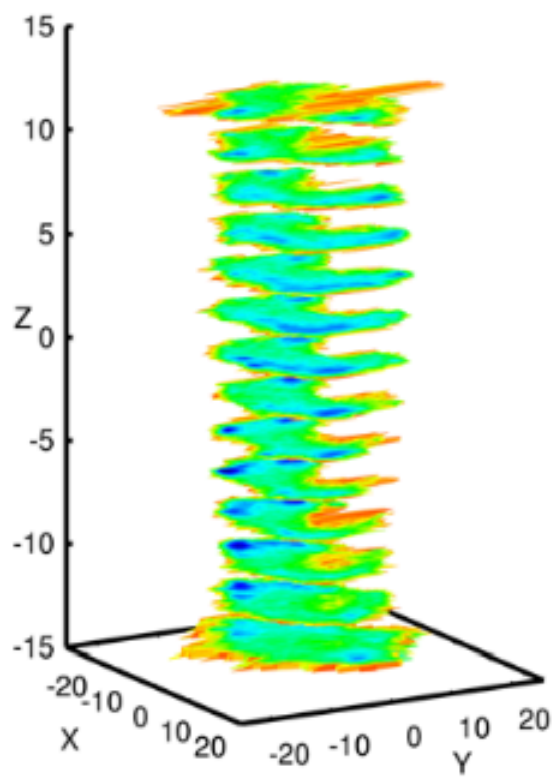

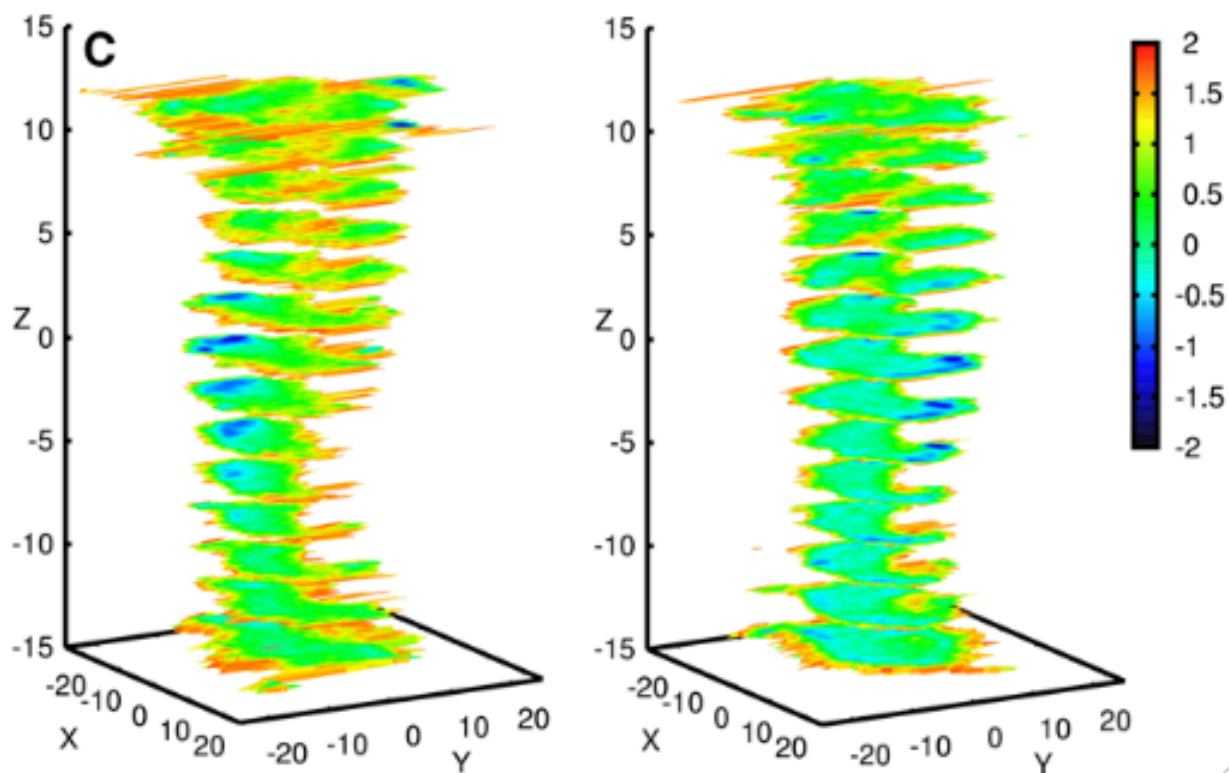

**FIGURE S8.** Two-dimensional multi-ion PMF profiles [in kcal/mol] for both K<sup>+</sup> (*left*) and Cl<sup>-</sup> (*right*) in systems (A) S1\_0, (B) S2\_0, and (C) S3\_0. The PMF profiles are calculated using  $\mathcal{W}_{\alpha,2D}(X, Y) = -k_{\text{B}}T \ln[C_{\alpha}(X, Y)/C_{\text{ref}}]$  for 2 Å slabs along the Z-axis, ranging from -14 Å to 14 Å, in which  $k_{\text{B}}$ ,  $C_{\alpha}(X, Y)$ , and  $C_{\text{ref}}$  are the Boltzmann constant, local ion concentration at  $(X, Y)$ , and the bulk ion concentration. The PMF plots from different simulations are very similar, indicating a good convergence of ion distribution inside the pore.

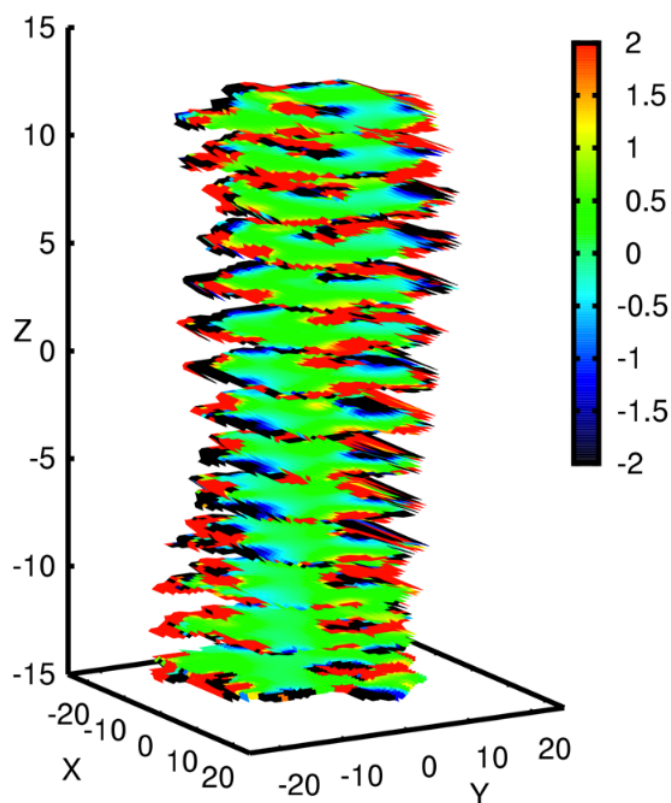

**FIGURE S9.** Two-dimensional electrostatic potential profile [in kcal/mol] probed by a unit charge inside the channel pore based on hVDAC1 NMR model #1. The electrostatic potential was computed using the PBEQ Solver module in CHARMM-GUI. The regions with negative electrostatic potential are favored by  $K^+$  ions and the positive electrostatic potential regions by  $Cl^-$  ions. The electrostatic potential profiles are well correlated with the calculated two-dimensional multi-ion PMFs in Figure S8.
